# Supplementary material for: Expression, Purification, Crystallization, and Enzyme Assays of Fumarylacetoacetate Hydrolase Domain-Containing Proteins
Source: PubMed Central journal article supplement (PMC7115867; doi:10.3791/59729), 2019-06-20
Supplement: EMS85698-supplement-Materials_List.pdf [file EMS85698-supplement-Materials_List.pdf]

Materials List for:

## Expression, Purification, Crystallization, and Enzyme Assays of Fumarylacetoacetate Hydrolase Domain-Containing Proteins

Alexander K. H. Weiss<sup>1,2</sup>, Max Holzknicht<sup>1,2</sup>, Elia Cappuccio<sup>1,2</sup>, Ilaria Dorigatti<sup>1</sup>, Karin Kreidl<sup>1</sup>, Andreas Naschberger<sup>3</sup>, Bernhard Rupp<sup>3</sup>, Hubert Gstach<sup>4</sup>, Pidder Jansen-Dürr<sup>1,2</sup>

<sup>1</sup>Research Institute for Biomedical Aging Research, University of Innsbruck Austria

<sup>2</sup>Center for Molecular Biosciences Innsbruck (CMBI), University of Innsbruck Austria

<sup>3</sup>Division of Genetic Epidemiology, Medical University of Innsbruck Austria

<sup>4</sup>Faculty of Chemistry, Department of Organic Chemistry, University of Vienna Austria

Correspondence to: Alexander K. H. Weiss at [alexander.weiss@uibk.ac.at](mailto:alexander.weiss@uibk.ac.at)

URL: <https://www.jove.com/video/59729>

DOI: [doi:10.3791/59729](https://doi.org/10.3791/59729)

### Materials

| Name                                      | Company       | Catalog Number | Comments                                                                                                                                                                                                                                                                                                                  |
|-------------------------------------------|---------------|----------------|---------------------------------------------------------------------------------------------------------------------------------------------------------------------------------------------------------------------------------------------------------------------------------------------------------------------------|
| BL21(DE3) pLysS competent E. coli         | Promega       | L1195          | High-efficiency protein expression from gene with T7 promoter and ribosome binding site                                                                                                                                                                                                                                   |
| pET E. coli T7 Expression Vectors         | MERCK         | -              | <a href="http://www.merckmillipore.com/AT/de/life-science-research/genomic-analysis/dna-preparation-cloning/pet-expression-vectors/qFSb.qB.mLQAAAF6.VkiQ0G,nav">http://www.merckmillipore.com/AT/de/life-science-research/genomic-analysis/dna-preparation-cloning/pet-expression-vectors/qFSb.qB.mLQAAAF6.VkiQ0G,nav</a> |
| 0.45 µm filter units                      | MERCK         | SLHP033NS      | Millex-HP, 0.45 µm, PES 33 mm, not steril                                                                                                                                                                                                                                                                                 |
| 0.22 µm filter units                      | MERCK         | SLGP033RS      | Millex-HP, 0.22 µm, PES 33 mm, not steril                                                                                                                                                                                                                                                                                 |
| Eppendorf tubes 1.5 mL                    | VWR           | 525-1042       | microcentrifugal tubes; autoclaved                                                                                                                                                                                                                                                                                        |
| 15 mL Falcon                              | VWR           | 734-0451       | centrifugal tubes                                                                                                                                                                                                                                                                                                         |
| 50 mL Falcon                              | VWR           | 734-0448       | centrifugal tubes                                                                                                                                                                                                                                                                                                         |
| PS Cuvettes Spectrophotometer Semi-Micro  | VWR           | 30622-758      | VIS transparent cuvettes                                                                                                                                                                                                                                                                                                  |
| UV Cuvettes Spectrophotometer Semi-Micro  | VWR           | 47727-024      | UV/VIS transparent cuvettes                                                                                                                                                                                                                                                                                               |
| isopropyl-β-D-thiogalactopyranosid (IPTG) | ROTH          | 2316           | chemical used for induction of protein expression with the DE3/pET system                                                                                                                                                                                                                                                 |
| imidazole                                 | ROTH          | X998           | chemical used for elution of polyhistidine (6xHis) sequences from a nickel-charged affinity resin                                                                                                                                                                                                                         |
| Glass Econo-Column Columns                | Bio-Rad       | -              | <a href="http://www.bio-rad.com/de-at/product/glass-econo-column-columns?ID=2cfb1c6e-32e8-4c72-b532-dd39013d707d&amp;pcc_loc=catprod">http://www.bio-rad.com/de-at/product/glass-econo-column-columns?ID=2cfb1c6e-32e8-4c72-b532-dd39013d707d&amp;pcc_loc=catprod</a>                                                     |
| chloramphenicol                           | Sigma-Aldrich | C0378          | antibiotic for bacterial growth selection; resistance encoded in pLysS plasmid of BL21(DE3) E. coli; 25 µg/mL final concentration                                                                                                                                                                                         |
| kanamycin                                 | Sigma-Aldrich | 60615          | antibiotic for bacterial growth selection; to be used if this resistance is encoded in the employed pET vector; 50 µg/mL final concentration                                                                                                                                                                              |

|                                                    |                             |         |                                                                                                                                                                                                                                                                                                                                                                   |
|----------------------------------------------------|-----------------------------|---------|-------------------------------------------------------------------------------------------------------------------------------------------------------------------------------------------------------------------------------------------------------------------------------------------------------------------------------------------------------------------|
| ampicillin                                         | Sigma-Aldrich               | A1593   | antibiotic for bacterial growth selection; to be used if this resistance is encoded in the employed pET vector; 100 µg/mL final concentration                                                                                                                                                                                                                     |
| Ultra-15, MWCO 10 kDa                              | Sigma-Aldrich               | Z706345 | centrifugal filters for protein enrichment; <a href="https://www.sigmaaldrich.com/catalog/product/sigma/z706345?lang=de&amp;ion=AT">https://www.sigmaaldrich.com/catalog/product/sigma/z706345?lang=de&amp;ion=AT</a>                                                                                                                                             |
| Ultra-0.5 Centrifugal Filter Units                 | Sigma-Aldrich               | Z677108 | centrifugal filters for protein enrichment; <a href="https://www.sigmaaldrich.com/catalog/product/ALDRICH/Z677108?lang=de&amp;region=AT&amp;cm_sp=Insite_-_prodRecCold_xviews_-_prodRecCold5-2">https://www.sigmaaldrich.com/catalog/product/ALDRICH/Z677108?lang=de&amp;region=AT&amp;cm_sp=Insite_-_prodRecCold_xviews_-_prodRecCold5-2</a>                     |
| oxaloacetic acid                                   | Sigma-Aldrich               | O4126   | TCA metabolite                                                                                                                                                                                                                                                                                                                                                    |
| sodium oxalate                                     | Sigma-Aldrich               | 71800   | a competitive inhibitor of FAH superfamily enzymes                                                                                                                                                                                                                                                                                                                |
| Dialysis tubing cellulose membrane                 | Sigma-Aldrich               | D9277   | <a href="https://www.sigmaaldrich.com/catalog/product/sigma/d9277">https://www.sigmaaldrich.com/catalog/product/sigma/d9277</a> ; or comparable                                                                                                                                                                                                                   |
| Ni-NTA agarose                                     | Thermo-Fischer              | R90101  | a nickel-charged affinity resin that can be used to purify recombinant proteins containing a polyhistidine (6xHis) sequence                                                                                                                                                                                                                                       |
| 96-Well UV Microplate                              | Thermo-Fischer              | 8404    | UV/VIS transparent flat-bottom 96 well plates                                                                                                                                                                                                                                                                                                                     |
| PageRuler Prestained Protein Ladder, 10 to 180 kDa | Thermo-Fischer              | 26616   | <a href="https://www.thermofisher.com/order/catalog/product/26616?SID=srch-hj-26616">https://www.thermofisher.com/order/catalog/product/26616?SID=srch-hj-26616</a>                                                                                                                                                                                               |
| ÅKTA FPLC system                                   | GE Healthcare Life Sciences | -       | using the FPLC system by GE Healthcare; different custom versions exist; this work used the "ÅKTA pure" system                                                                                                                                                                                                                                                    |
| HiTrap Phenyl HP column                            | GE Healthcare Life Sciences | -       | <a href="https://www.gelifesciences.com/en/it/shop/chromatography/prepacked-columns/hydrophobic-interaction/hitrap-phenyl-hp-p-05630">https://www.gelifesciences.com/en/it/shop/chromatography/prepacked-columns/hydrophobic-interaction/hitrap-phenyl-hp-p-05630</a>                                                                                             |
| Mono S 10/100 GL                                   | GE Healthcare Life Sciences | -       | <a href="https://www.gelifesciences.com/en/ch/shop/chromatography/prepacked-columns/ion-exchange/mono-s-cation-exchange-chromatography-column-p-00723">https://www.gelifesciences.com/en/ch/shop/chromatography/prepacked-columns/ion-exchange/mono-s-cation-exchange-chromatography-column-p-00723</a>                                                           |
| Mono Q 10/100 GL                                   | GE Healthcare Life Sciences | -       | <a href="https://www.gelifesciences.com/en/ch/shop/chromatography/prepacked-columns/ion-exchange/mono-q-anion-exchange-chromatography-column-p-00608">https://www.gelifesciences.com/en/ch/shop/chromatography/prepacked-columns/ion-exchange/mono-q-anion-exchange-chromatography-column-p-00608</a>                                                             |
| HiLoad Superdex column 75 µg (G75)                 | GE Healthcare Life Sciences | -       | <a href="https://www.gelifesciences.com/en/ch/shop/chromatography/prepacked-columns/size-exclusion/hiload-superdex-75-pg-preparative-size-exclusion-chromatography-columns-p-05800">https://www.gelifesciences.com/en/ch/shop/chromatography/prepacked-columns/size-exclusion/hiload-superdex-75-pg-preparative-size-exclusion-chromatography-columns-p-05800</a> |
| HiLoad Superdex column 200 µg (G200)               | GE Healthcare Life Sciences | -       | <a href="https://www.gelifesciences.com/en/ch/shop/chromatography/prepacked-columns/size-exclusion/hiload-superdex-200-">https://www.gelifesciences.com/en/ch/shop/chromatography/prepacked-columns/size-exclusion/hiload-superdex-200-</a>                                                                                                                       |

|                                 |                            |         |                                                                                                                                                                                                                                  |
|---------------------------------|----------------------------|---------|----------------------------------------------------------------------------------------------------------------------------------------------------------------------------------------------------------------------------------|
|                                 |                            |         | pg-preparative-size-exclusion-chromatography-columns-p-06283                                                                                                                                                                     |
| TECAN microplate reader         | TECAN Life Sciences        | -       | <a href="https://lifesciences.tecan.com/microplate-readers">https://lifesciences.tecan.com/microplate-readers</a>                                                                                                                |
| acetylpyruvate                  | MoleculeCrafting.HuGs e.U. | -       | custom synthesis                                                                                                                                                                                                                 |
| benzoylpyruvate                 | MoleculeCrafting.HuGs e.U. | -       | custom synthesis                                                                                                                                                                                                                 |
| VDX™ plate (24 wells)           | Hampton                    | HR3-142 | 24 well plates used for crystallization via Hanging Drop Vapor Diffusion                                                                                                                                                         |
| paraffin oil                    | Hampton                    | HR3-411 | used for crystallization via Hanging Drop Vapor Diffusion                                                                                                                                                                        |
| coverslips (22 mm)              | Karl Hecht KG              | 14043   | coverslips used for crystallization via Hanging Drop Vapor Diffusion                                                                                                                                                             |
| Luria broth (LB) medium         | self-prepared              | -       | a general growth medium for E. coli: 5 g/L yeast extract; 10 g/L peptone from casein; 10 g/L sodium chloride; 12 g/L agar-agar                                                                                                   |
| NZCYM medium                    | self-prepared              | -       | a better growth medium for E. coli, used for amplification: 10 g/L NZ amine; 5 g/L NaCl; 5 g/L yeast extract; 1 g/L casamino acids; 2 g/L MgSO <sub>4</sub> ; adjust pH to 7.4                                                   |
| Luria broth (LB) agarose plates | self-prepared              | -       | autoclaved agarose plates containing LB-medium and antibiotics for bacterial growth selection; <a href="https://www.addgene.org/protocols/pouring-lb-agar-plates/">https://www.addgene.org/protocols/pouring-lb-agar-plates/</a> |
| Ni-NTA running buffer           | self-prepared              | -       | 20 mM Tris-HCl pH 7.4; 50-300 mM NaCl; 10-200 mM imidazole; ranges: optimal value varies among FAHD proteins                                                                                                                     |
| Ni-NTA elution buffer           | self-prepared              | -       | 20 mM Tris-HCl pH 7.4; 50-300 mM NaCl; 200-500 mM imidazole; ranges: optimal value varies among FAHD proteins                                                                                                                    |
| HIC running buffer              | self-prepared              | -       | 44 mM NaH <sub>2</sub> PO <sub>4</sub> ; 6 mM Na <sub>2</sub> HPO <sub>4</sub> ; 100 mM NaCl; 20 mM DTT; adjust to pH 7                                                                                                          |
| HIC running buffer AS           | self-prepared              | -       | HIC running buffer saturated with ammonium sulfate (AS); adjust to pH 7: 70 g ammonium sulfate + 90 mL buffer, stirred overnight in the cold room; adjust to pH 7.0                                                              |
| Mono S low salt buffer          | self-prepared              | -       | 44 mM NaH <sub>2</sub> PO <sub>4</sub> ; 6 mM Na <sub>2</sub> HPO <sub>4</sub> ; 10-300 mM NaCl; ranges: optimal value varies among FAHD proteins                                                                                |
| Mono S high salt buffer         | self-prepared              | -       | 44 mM NaH <sub>2</sub> PO <sub>4</sub> ; 6 mM Na <sub>2</sub> HPO <sub>4</sub> ; 1-2 M NaCl; ranges: optimal value varies among FAHD proteins                                                                                    |
| Mono Q low salt buffer          | self-prepared              | -       | 20 mM Tris-HCl; 15 mM NaCl; adjust to pH 8.0                                                                                                                                                                                     |
| Mono Q high salt buffer         | self-prepared              | -       | 20 mM Tris-HCl; 1 M NaCl; 10 % glycerol; adjust to pH 8.0                                                                                                                                                                        |
| G75 / G200 running buffer       | self-prepared              | -       | 15 mM Tris-HCl; 300 mM NaCl; adjust to pH 7.4                                                                                                                                                                                    |

|                                        |               |   |                                                                            |
|----------------------------------------|---------------|---|----------------------------------------------------------------------------|
| enzyme assay buffer                    | self-prepared | - | 50 mM Tris-HCl pH7.4; 100 mM KCl; 1 mM MgCl <sub>2</sub>                   |
| protein crystallization buffer         | self-prepared | - | G75 / G200 running buffer with 1 mM DTT                                    |
| reservoir solution for crystallization | self-prepared | - | 100 mM Na-HEPES pH 7.5; 5-20 % (w/v) PEG4k; 10 mM-200 mM MgCl <sub>2</sub> |
